# Supplementary material for: Spray-Drying Microencapsulation of Bauhinia ungulata L. var. obtusifolia Aqueous Extract Containing Phenolic Compounds: A Comparative Study Using Different Wall Materials
Source: MDPI journal article supplement (doi:10.3390/pharmaceutics16040488), 2024-04-02
Supplement: s1 [file s1]

## Supplementary Material

### S1. Particle size distribution

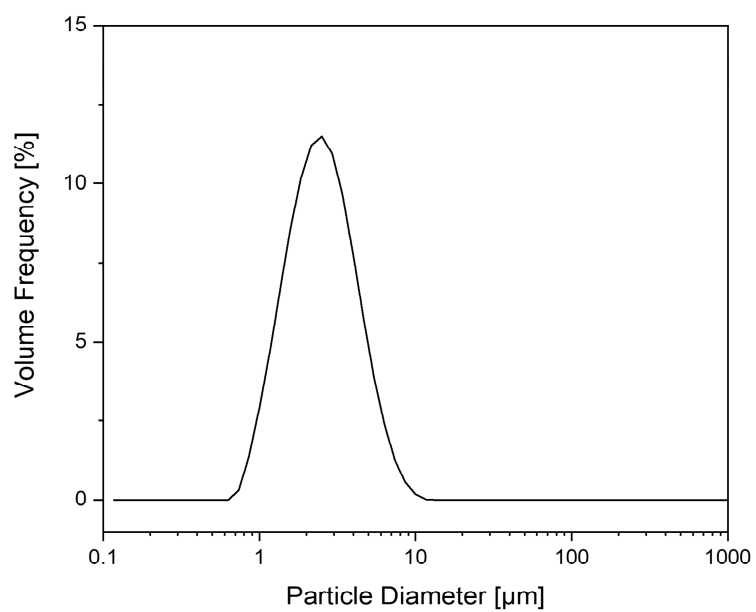

**Figure S1.** Particle size distribution of Bu-MD4.

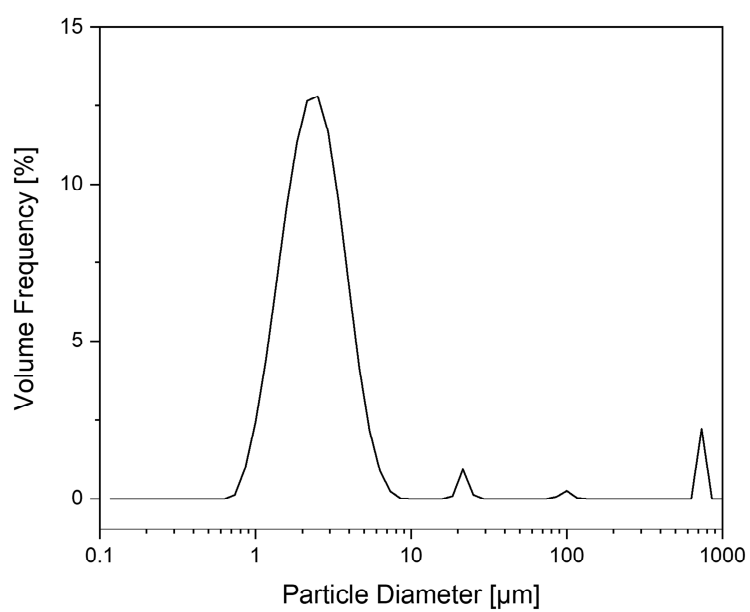

**Figure S2.** Particle size distribution of Bu-MD11.

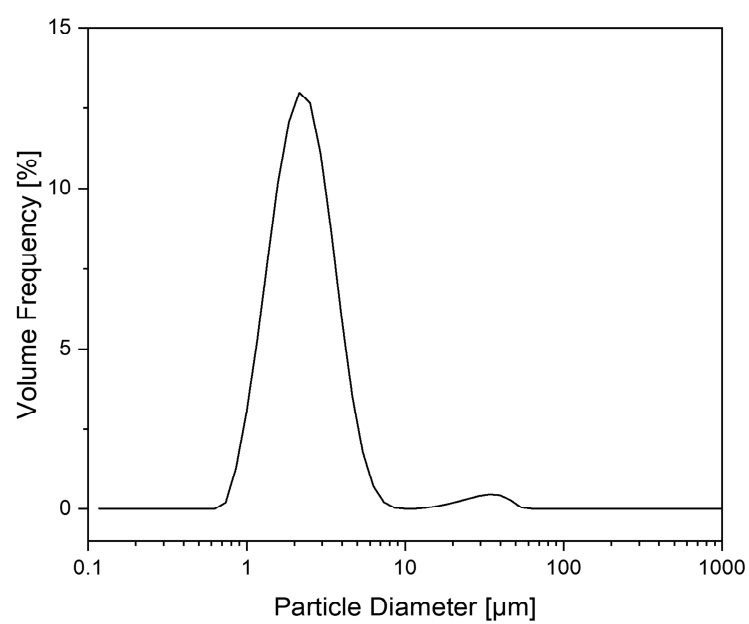

**Figure S3.** Particle size distribution of Bu-βCD.

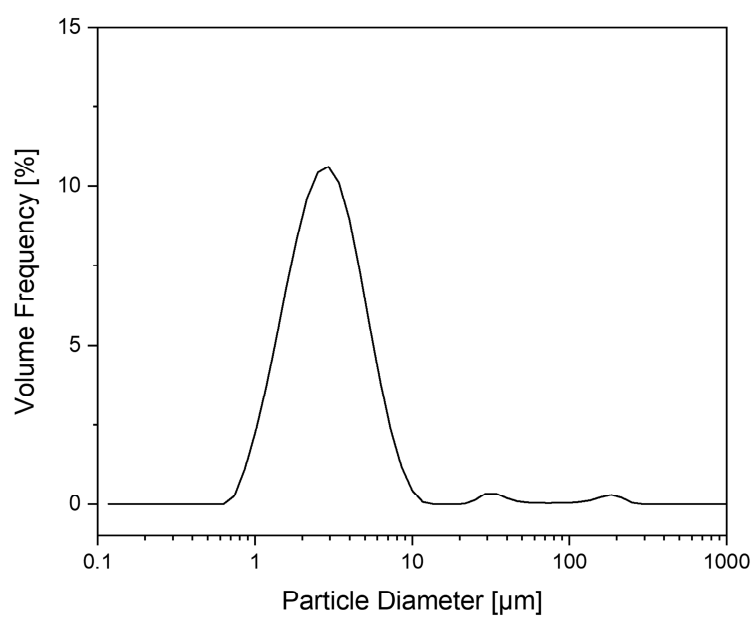

**Figure S4.** Particle size distribution of Bu-CMC.

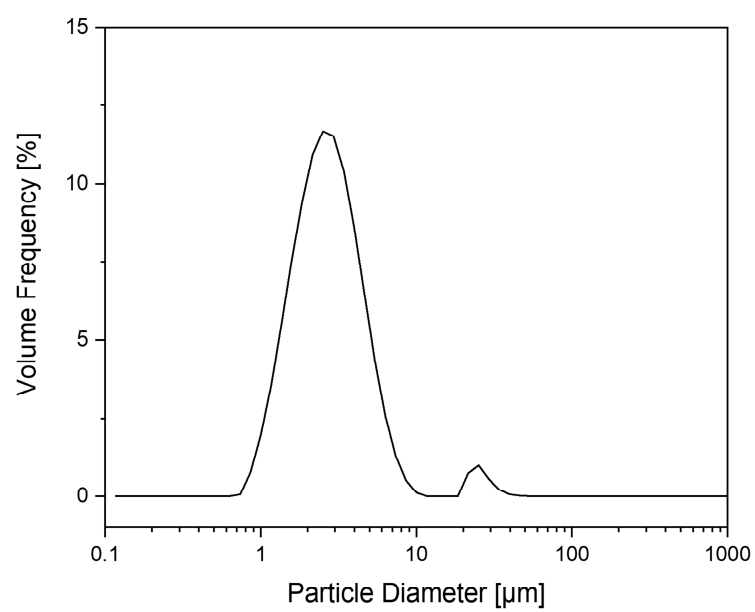

**Figure S5.** Particle size distribution of Bu-Pec.

## S2. Differential scanning calorimetry

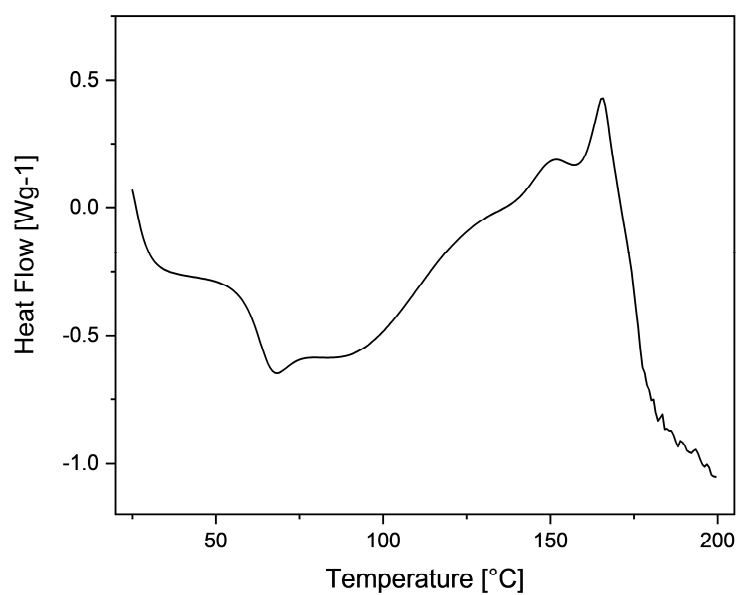

**Figure S6.** DSC thermogram of Bu-A (^exo).

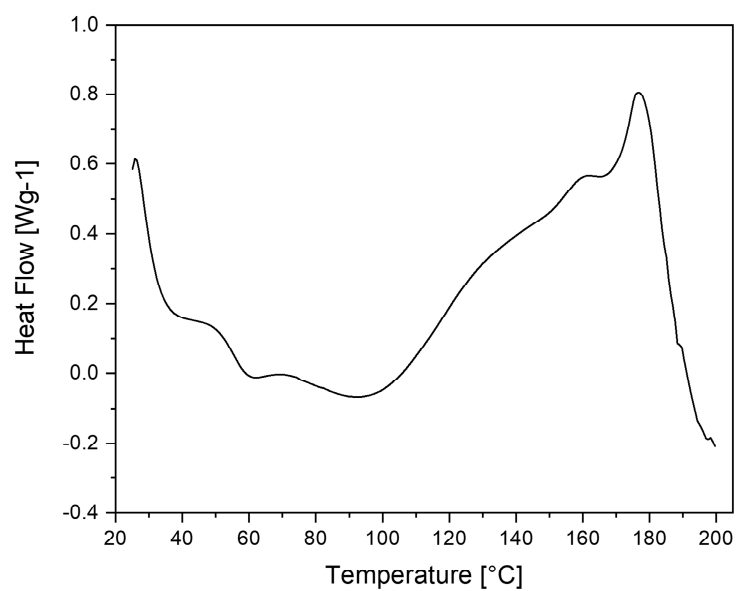

**Figure S7.** DSC thermogram of Bu-MD4 (^exo).

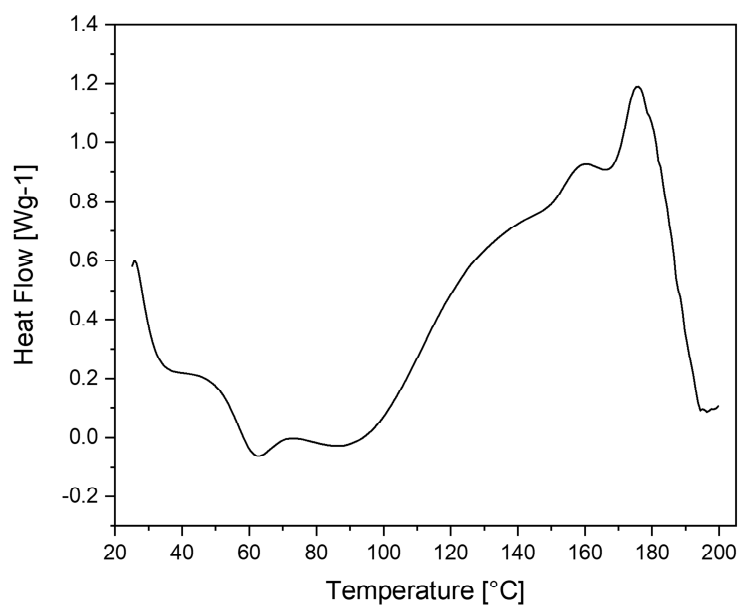

**Figure S8.** DSC thermogram of Bu-MD11 ( $\Delta$ exo).

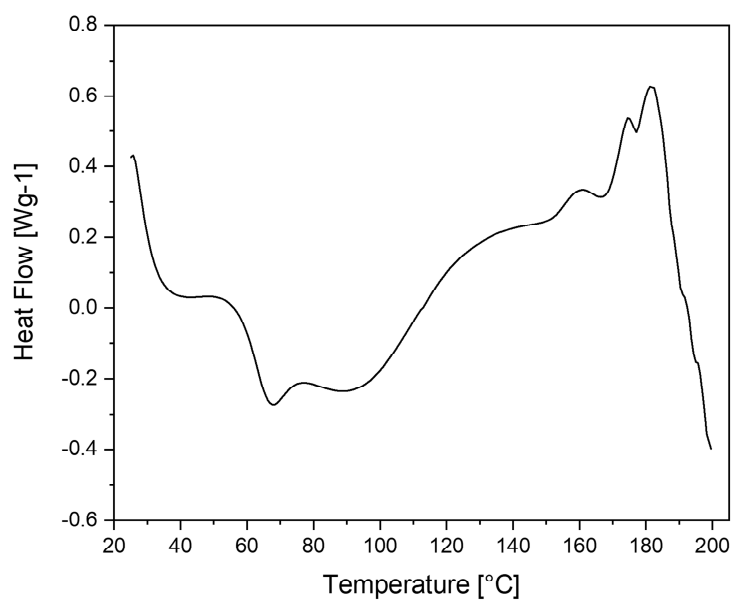

**Figure S9.** DSC thermogram of Bu-βCD ( $\Delta$ exo).

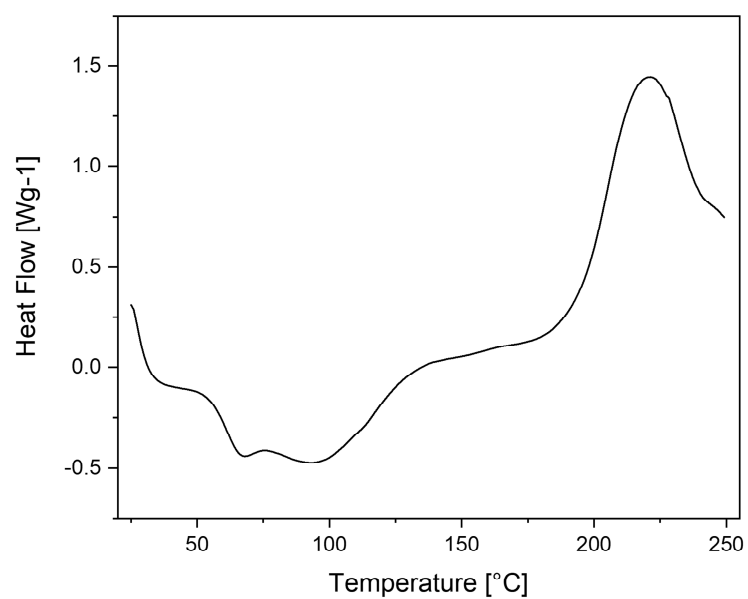

**Figure S10.** DSC thermogram of Bu-CMC ( $\Delta_{\text{exo}}$ ).

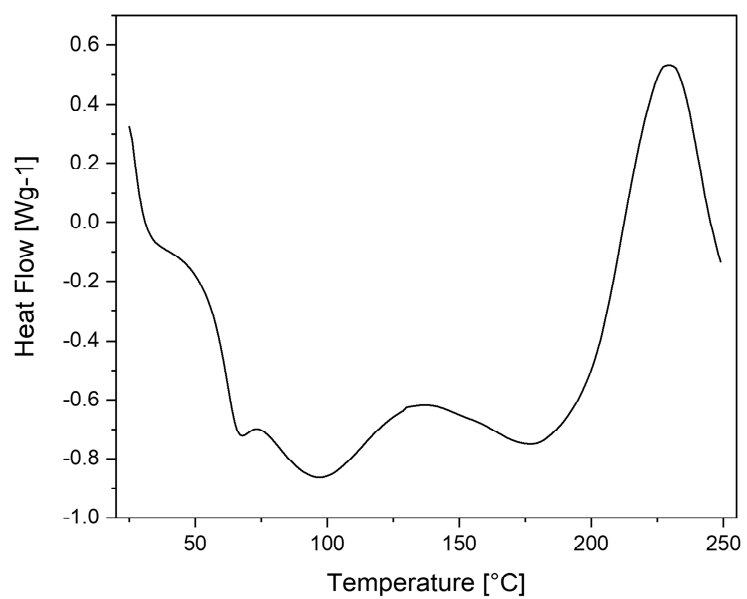

**Figure S11.** DSC thermogram of Bu-Pec ( $\Delta_{\text{exo}}$ ).

### S3. Statistical analysis

**Table S1.** Tukey's post-hoc comparison between the viscosity of the solutions to be sprayed without (Bu-A) or with wall material (Bu-MD4, Bu-MD11, Bu- $\beta$ CD, Bu-Pec and Bu-CMC).

| Comparison                | p-value |
|---------------------------|---------|
| Bu-A vs. Bu-CMC           | <0.0001 |
| Bu-MD4 vs. Bu-CMC         | <0.0001 |
| Bu-11 vs. Bu-CMC          | <0.0001 |
| Bu- $\beta$ CD vs. Bu-CMC | <0.0001 |
| Bu-CMC vs. Bu-Pec         | <0.0001 |

**Table S2.** Tukey's post-hoc comparison between the particle size distribution of the SD microparticles containing the wall material.

| Parameter        | Comparison                | p-value |
|------------------|---------------------------|---------|
| Dv <sub>50</sub> | Bu- $\beta$ CD vs. Bu-CMC | 0.0242  |
| Dv <sub>90</sub> | Bu- $\beta$ CD vs. Bu-CMC | 0.0457  |

**Table S3.** Tukey's post-hoc comparison between the moisture content of the SD microparticles.

| Comparison       | p-value |
|------------------|---------|
| Bu-A vs. Bu-MD11 | 0.0310  |
| Bu-A vs. Bu-CMC  | 0.0029  |
| Bu-A vs. Bu-Pec  | 0.0104  |

**Table S4.** Tukey's post-hoc comparison between the initial decomposition temperature of the SD microparticles.

| Comparison                | p-value |
|---------------------------|---------|
| Bu-A vs. Bu-CMC           | <0.0001 |
| Bu-A vs. Bu-Pec           | <0.0001 |
| Bu-MD4 vs. Bu-CMC         | <0.0001 |
| Bu-MD4 vs. Bu-Pec         | <0.0001 |
| Bu-MD11 vs. Bu-CMC        | <0.0001 |
| Bu-MD11 vs. Bu-Pec        | <0.0001 |
| Bu- $\beta$ CD vs. Bu-CMC | <0.0001 |
| Bu- $\beta$ CD vs. Bu-Pec | <0.0001 |



**Table S5.** Tukey's post-hoc comparison between the total flavonoid content in the extract Bu-L and the SD microparticles.

| Comparison                | p-value |
|---------------------------|---------|
| Bu-L vs. Bu-MD4           | <0.0001 |
| Bu-L vs. Bu-MD11          | <0.0001 |
| Bu-L vs. Bu- $\beta$ CD   | <0.0001 |
| Bu-L vs. Bu-CMC           | 0.0455  |
| Bu-A vs. Bu-MD4           | <0.0001 |
| Bu-A vs. Bu-MD11          | <0.0001 |
| Bu-A vs. Bu- $\beta$ CD   | <0.0001 |
| Bu-MD4 vs. Bu-CMC         | <0.0001 |
| Bu-MD4 vs. Bu-Pec         | <0.0001 |
| Bu-MD11 vs. Bu-CMC        | <0.0001 |
| Bu-MD11 vs. Bu-Pec        | <0.0001 |
| Bu- $\beta$ CD vs. Bu-CMC | <0.0001 |
| Bu- $\beta$ CD vs. Bu-Pec | <0.0001 |
| Bu-CMC vs. Bu-Pec         | 0.0149  |

**Table S6.** Tukey's post-hoc comparison between the total phenolic content on the lyophilized extract (Bu-L) and the SD microparticles.

| <b>Comparison</b>         | <b>p-value</b> |
|---------------------------|----------------|
| Bu-L vs. Bu-MD4           | 0.0001         |
| Bu-L vs. Bu-MD11          | 0.0108         |
| Bu-L vs. Bu- $\beta$ CD   | 0.0002         |
| Bu-L vs. Bu-CMC           | <0.0001        |
| Bu-L vs. Bu-Pec           | <0.0001        |
| Bu-A vs. Bu-MD4           | 0.0001         |
| Bu-A vs. Bu-MD11          | 0.0120         |
| Bu-A vs. Bu- $\beta$ CD   | 0.0002         |
| Bu-A vs. Bu-CMC           | <0.0001        |
| Bu-A vs. Bu-Pec           | <0.0001        |
| Bu-MD4 vs. Bu-CMC         | 0.0275         |
| Bu-MD4 vs. Bu-Pec         | 0.0008         |
| Bu-MD11 vs. Bu-CMC        | 0.0003         |
| Bu-MD11 vs. Bu-Pec        | <0.0001        |
| Bu- $\beta$ CD vs. Bu-CMC | 0.0191         |
| Bu- $\beta$ CD vs. Bu-Pec | 0.0006         |

**Table S7.** Tukey's post-hoc comparison between the total phenolic content on the microparticles surface (PS) and encapsulation yield (YE) of the SD microparticles.

| Parameter | Comparison                | p-value |
|-----------|---------------------------|---------|
| PS        | Bu-MD4 vs. Bu-CMC         | 0.0016  |
|           | Bu-MD4 vs. Bu-CMC         | 0.0485  |
| YE        | Bu-MD4 vs. Bu-Pec         | 0.0035  |
|           | Bu-MD11 vs. Bu-CMC        | 0.0016  |
|           | Bu-MD11 vs. Bu-Pec        | 0.0002  |
|           | Bu- $\beta$ CD vs. Bu-CMC | 0.0369  |
|           | Bu- $\beta$ CD vs. Bu-Pec | 0.0027  |

**Table S8.** Tukey's post-hoc comparison between the encapsulation efficiency of the SD microparticles.

| Comparison                | p-value |
|---------------------------|---------|
| Bu-MD4 vs. Bu-MD11        | 0.0072  |
| Bu-MD4 vs. Bu-Pec         | 0.0427  |
| Bu-MD11 vs. Bu-CMC        | 0.0154  |
| Bu-MD11 vs. Bu-Pec        | <0.0001 |
| Bu- $\beta$ CD vs. Bu-Pec | 0.0020  |
| Bu-CMC vs. Bu-Pec         | 0.0195  |

**Table S9.** Tukey's post-hoc comparison between the scavenging percentages and TAA against DPPH<sup>•</sup> radicals.

| Scavenging percentages |         | TAA                |         |
|------------------------|---------|--------------------|---------|
| Comparison             | p-value | Comparison         | p-value |
| Bu-L vs. Bu-A          | 0.0068  | Bu-L vs. Bu-MD4    | <0.0001 |
| Bu-L vs. Bu-MD4        | <0.0001 | Bu-L vs. Bu-MD11   | <0.0001 |
| Bu-L vs. Bu-MD11       | <0.0001 | Bu-L vs. Bu-βCD    | <0.0001 |
| Bu-L vs. Bu-βCD        | <0.0001 | Bu-L vs. Bu-CMC    | <0.0001 |
| Bu-L vs. Bu-CMC        | <0.0001 | Bu-L vs. Bu-Pec    | <0.0001 |
| Bu-L vs. Bu-Pec        | <0.0001 | Bu-A vs. Bu-MD4    | 0.0035  |
| Bu-A vs. Bu-MD4        | 0.0005  | Bu-A vs. Bu-MD11   | <0.0001 |
| Bu-A vs. Bu-MD11       | <0.0001 | Bu-A vs. Bu-βCD    | <0.0001 |
| Bu-A vs. Bu-βCD        | <0.0001 | Bu-A vs. Bu-CMC    | <0.0001 |
| Bu-A vs. Bu-CMC        | <0.0001 | Bu-A vs. Bu-Pec    | <0.0001 |
| Bu-A vs. Bu-Pec        | <0.0001 | Bu-MD4 vs. Bu-MD11 | <0.0001 |
| Bu-MD4 vs. Bu-MD11     | <0.0001 | Bu-MD4 vs. Bu-βCD  | <0.0001 |
| Bu-MD4 vs. Bu-βCD      | <0.0001 | Bu-MD4 vs. Bu-CMC  | 0.0001  |
| Bu-MD4 vs. Bu-CMC      | <0.0001 | Bu-MD4 vs. Bu-Pec  | 0.0033  |
| Bu-MD4 vs. Bu-Pec      | 0.0016  | Bu-MD11 vs. Bu-Pec | 0.0035  |
| Bu-MD11 vs. Bu-Pec     | 0.0047  | Bu-βCD vs. Bu-Pec  | 0.0047  |
| Bu-βCD vs. Bu-Pec      | 0.0062  | -                  | -       |

**Table S10.** Tukey's post-hoc comparison between the scavenging percentages and TAA against ABTS<sup>+</sup> radicals.

| Scavenging percentages |         | TAA                |         |
|------------------------|---------|--------------------|---------|
| Comparison             | p-value | Comparison         | p-value |
| Bu-L vs. Bu-A          | 0.0005  | Bu-L vs. Bu-A      | 0.0004  |
| Bu-L vs. Bu-CMC        | <0.0001 | Bu-L vs. Bu-CMC    | <0.0001 |
| Bu-L vs. Bu-Pec        | <0.0001 | Bu-L vs. Bu-Pec    | <0.0001 |
| Bu-A vs. Bu-MD4        | 0.0004  | Bu-A vs. Bu-MD4    | 0.0003  |
| Bu-A vs. Bu-MD11       | 0.0052  | Bu-A vs. Bu-MD11   | 0.0040  |
| Bu-A vs. Bu-βCD        | 0.0014  | Bu-A vs. Bu-βCD    | 0.0012  |
| Bu-A vs. Bu-CMC        | 0.0221  | Bu-A vs. Bu-CMC    | 0.0073  |
| Bu-MD4 vs. Bu-CMC      | <0.0001 | Bu-MD4 vs. Bu-CMC  | <0.0001 |
| Bu-MD4 vs. Bu-Pec      | <0.0001 | Bu-MD4 vs. Bu-Pec  | <0.0001 |
| Bu-MD11 vs. Bu-CMC     | <0.0001 | Bu-MD11 vs. Bu-CMC | <0.0001 |
| Bu-MD11 vs. Bu-Pec     | 0.0001  | Bu-MD11 vs. Bu-Pec | <0.0001 |
| Bu-βCD vs. Bu-CMC      | <0.0001 | Bu-βCD vs. Bu-CMC  | <0.0001 |
| Bu-βCD vs. Bu-Pec      | <0.0001 | Bu-βCD vs. Bu-Pec  | <0.0001 |

**Table S11.** Tukey's post-hoc comparison between the content on chlorogenic acid in the lyophilized extract (Bu-L) and the SD microparticles.

| $\mu\text{g/mL}$        |         | $\text{mg/g}$           |         |
|-------------------------|---------|-------------------------|---------|
| Comparison              | p-value | Comparison              | p-value |
| Bu-L vs. Bu-A           | <0.0001 | Bu-L vs. Bu-A           | <0.0001 |
| Bu-L vs. Bu-MD4         | <0.0001 | Bu-L vs. Bu-MD4         | 0.0155  |
| Bu-L vs. Bu-MD11        | 0.0008  | Bu-L vs. Bu- $\beta$ CD | 0.0009  |
| Bu-L vs. Bu- $\beta$ CD | <0.0001 | Bu-L vs. Bu-CMC         | <0.0001 |
| Bu-L vs. Bu-CMC         | <0.0001 | Bu-L vs. Bu-Pec         | <0.0001 |
| Bu-L vs. Bu-Pec         | <0.0001 | Bu-A vs. Bu-MD4         | <0.0001 |
| Bu-A vs. Bu-MD4         | <0.0001 | Bu-A vs. Bu-MD11        | <0.0001 |
| Bu-A vs. Bu-MD11        | <0.0001 | Bu-A vs. Bu- $\beta$ CD | 0.0001  |
| Bu-A vs. Bu- $\beta$ CD | <0.0001 | Bu-A vs. Bu-CMC         | 0.0044  |
| Bu-A vs. Bu-CMC         | 0.0007  | Bu-A vs. Bu-Pec         | 0.0086  |
| Bu-A vs. Bu-Pec         | 0.0014  | Bu-MD4 vs. Bu-CMC       | 0.0339  |
| Bu-MD4 vs. Bu-Pec       | 0.0444  | Bu-MD4 vs. Bu-Pec       | 0.0176  |
| Bu-MD11 vs. Bu-CMC      | 0.0063  | Bu-MD11 vs. Bu-CMC      | 0.0039  |
| Bu-MD11 vs. Bu-Pec      | 0.0028  | Bu-MD11 vs. Bu-Pec      | 0.0020  |

**Table S12.** Tukey's post-hoc comparison between the content on rutin in the lyophilized extract (Bu-L) and the SD microparticles.

| $\mu\text{g/mL}$          |         | $\text{mg/g}$             |         |
|---------------------------|---------|---------------------------|---------|
| Comparison                | p-value | Comparison                | p-value |
| Bu-L vs. Bu-A             | <0.0001 | Bu-L vs. Bu-A             | <0.0001 |
| Bu-L vs. Bu-MD4           | 0.0014  | Bu-L vs. Bu- $\beta$ CD   | 0.0018  |
| Bu-L vs. Bu-MD11          | <0.0001 | Bu-L vs. Bu-CMC           | 0.0011  |
| Bu-L vs. Bu- $\beta$ CD   | <0.0001 | Bu-L vs. Bu-Pec           | <0.0001 |
| Bu-L vs. Bu-CMC           | <0.0001 | Bu-A vs. Bu-MD4           | <0.0001 |
| Bu-L vs. Bu-Pec           | <0.0001 | Bu-A vs. Bu-MD11          | <0.0001 |
| Bu-A vs. Bu-MD4           | <0.0001 | Bu-A vs. Bu- $\beta$ CD   | <0.0001 |
| Bu-A vs. Bu-MD11          | <0.0001 | Bu-A vs. Bu-CMC           | <0.0001 |
| Bu-A vs. Bu- $\beta$ CD   | <0.0001 | Bu-A vs. Bu-Pec           | <0.0001 |
| Bu-A vs. Bu-CMC           | <0.0001 | Bu-MD4 vs. Bu- $\beta$ CD | 0.0136  |
| Bu-A vs. Bu-Pec           | <0.0001 | Bu-MD4 vs. Bu-CMC         | 0.0086  |
| Bu-MD4 vs. Bu- $\beta$ CD | 0.0139  | Bu-MD4 vs. Bu-Pec         | 0.0003  |
| Bu-MD4 vs. Bu-CMC         | 0.0298  | Bu-MD11 vs. Bu-Pec        | 0.0087  |
| Bu-MD4 vs. Bu-Pec         | 0.0006  | -                         | -       |
| Bu-MD11 vs. Bu-Pec        | 0.0113  | -                         | -       |
